# Supplementary material
Source: MDPI journal article supplement (https://www.mdpi.com/2075-163X/10/9/785)
Supplement: s1 [file s1]

| Object               | Inventory. no. | Dating                                                  | References |
|----------------------|----------------|---------------------------------------------------------|------------|
| Coins                | TA91/26        | Ptolemy II                                              | [32]       |
|                      | TA91/44        |                                                         |            |
|                      | TA91/54        |                                                         |            |
|                      | TA91/66        |                                                         |            |
|                      | TA91/67        |                                                         |            |
|                      | TA91/68        |                                                         |            |
|                      | Ta91/70        |                                                         |            |
|                      | TA98/71        |                                                         |            |
|                      | TA98/74        |                                                         |            |
|                      | TA98/77        |                                                         |            |
|                      | TA91/12p       | Ptolemy IV                                              |            |
|                      | TA98/51        |                                                         |            |
|                      | TA98/59        |                                                         |            |
|                      | TA98/80        |                                                         |            |
|                      | TA98/85        |                                                         |            |
|                      | TA98/103       |                                                         |            |
|                      | TA91/124p      | Ptolemy VI                                              |            |
|                      | TA98/2         |                                                         |            |
|                      | TA98/4         |                                                         |            |
|                      | TA98/5         |                                                         |            |
|                      | TA98/6         |                                                         |            |
|                      | TA98/7         |                                                         |            |
|                      | TA98/22        |                                                         |            |
|                      | TA98/42        |                                                         |            |
| Pottery stamps       | TA88/14        | 202-149 BC                                              | [31]       |
|                      | TA91/43        | 241-225 BC                                              |            |
|                      | TA91/15p       | 240 BC                                                  |            |
|                      | TA91/137p      | 240 BC                                                  |            |
|                      | TA91/22p       | 3 <sup>rd</sup> century BC                              |            |
|                      | TA95/147       | mid 2 <sup>nd</sup> century BC                          |            |
|                      | TA98/13        | 220-180 BC (rodian import)                              |            |
|                      | TA98/29        | late 3 <sup>rd</sup> - early 2 <sup>nd</sup> century BC |            |
| Terracotta Oil Lamps | TA91/23        | 200-125 BC                                              | [29]       |
|                      | TA91/127g      | early 3 <sup>rd</sup> century BC (300-150)              |            |
|                      | TA98/1         | mid 2 <sup>nd</sup> century BC (200-125)                |            |
|                      | TA98/28        | mid 2 <sup>nd</sup> century BC (200-125)                |            |
|                      | TA98/35        | 225-150 BC                                              |            |
|                      | TA98/57        | 225-150 BC                                              |            |
|                      | TA98/63        | 225-150 BC                                              |            |
|                      | TA98/12p       | 225-150 BC                                              |            |
|                      | TA98/17p       | 225-150 BC                                              |            |
|                      | TA98/23p       | 225-150 BC                                              |            |
